# Supplementary material for: Adherence to Mediterranean Diet: A Population-Based Longitudinal Cohort Study
Source: MDPI journal article supplement (doi:10.3390/nu15081844), 2023-04-12

## **SUPPLEMENTARY MATERIAL**

### **ADHERENCE TO MEDITERRANEAN DIET IN OLDER SUBJECTS: A POPULATION-BASED MID-TERM LONGITUDINAL COHORT STUDY**

#### **Authors**

Elisa Mattavelli <sup>1,2</sup>, Elena Olmastroni <sup>2,3</sup>, Manuela Casula <sup>2,3</sup>, Liliana Grigore <sup>2</sup>, Fabio Pellegatta <sup>2</sup>, Andrea Baragetti <sup>1,2</sup>, Paolo Magni <sup>1,2</sup>, Alberico L. Catapano <sup>2</sup>

#### **Affiliations**

1 Department of Pharmacological and Biomolecular Sciences, Università degli Studi di Milano, Milan 20133, Italy; elisa.mattavelli@unimi.it (E.M.); andrea.baragetti@unimi.it (A.B.); paolo.magni@unimi.it (P.M.);

2 MultiMedica IRCCS, 20092 Cinisello Balsamo, Milan, Italy; grigore.centroatero@gmail.com (L.G.); fabio.pellegatta@guest.unimi.it (F.P.); alberico.catapano@multimedica.it (A.L.C);

3 Epidemiology and Preventive Pharmacology Service (SEFAP), Department of Pharmacological and Biomolecular Sciences, Università degli Studi di Milano, 20133 Milan, Italy; elena.olmastroni@unimi.it (E.O.); manuela.casula@unimi.it (M.C.).

#### **Corresponding author**

Paolo Magni

Department of Pharmacological and Biomolecular Sciences, Università degli Studi di Milano, 20133, Milan, Italy; IRCCS MultiMedica, Sesto San Giovanni, 20099, Milan, Italy.

Electronic address: paolo.magni@unimi.it.

**Keywords:** Mediterranean diet, adherence, cardiovascular disease, metabolic disease

**Supplementary Table S1.** Demographic and clinical characteristics of participants.

| <b>Covariates</b>                  | <b>Baseline visit</b> | <b>Follow-up visit</b> | <b>p-value</b> |
|------------------------------------|-----------------------|------------------------|----------------|
| Weight, kg; mean (SD)              | 71.81 (14.03)         | 71.24 (14)             | 0.45           |
| BMI, kg/m <sup>2</sup> ; mean (SD) | 27.41 (4.5)           | 27.6 (4.62)            | 0.43           |
| WH ratio; mean (SD)                | 0.9 (0.09)            | 0.93 (0.09)            | <.0001         |
| SBP, mm Hg; mean (SD)              | 113.7 (42.18)         | 126.95 (17.02)         | <.0001         |
| DBP, mm Hg; mean (SD)              | 68.48 (18.57)         | 75.33 (10.62)          | <.0001         |
| Total Chol, mg/dL; mean (SD)       | 196.42 (35.81)        | 184.45 (34.58)         | <.0001         |
| HDL-C, mg/dL; mean (SD)            | 57.65 (13.93)         | 55.58 (15.11)          | 0.01           |
| LDL-C, mg/dL; mean (SD)            | 116.36 (30.69)        | 107.37 (29.91)         | <.0001         |
| TG, mg/dL; median [IQR]            | 97 [76-134]           | 101 [76-126]           | 0.63           |
| Fasting glucose, mg/dL; mean (SD)  | 105.16 (39.16)        | 100.05 (17.17)         | 0.002          |
| Dietary Therapy, %                 | 8.3                   | 7.45                   | 0.55           |
| Smoker, %                          | 11.88                 | 10.22                  | 0.57           |
| Physical activity, %               | 50.07                 | 46.12                  | <.0001         |
| Antihypertensive treatment, %      | 19.27                 | 34.46                  | <.0001         |
| Antidiabetic treatment, %          | 2.67                  | 8.16                   | <.0001         |
| Lipid-lowering treatment, %        | 35.02                 | 23.49                  | <.0001         |
| MetS, %                            | 27.99                 | 35.32                  | 0.003          |
| cIMT, mm; mean (SD)                | 0.79 (0.16)           | 0.82 (0.14)            | <.0001         |

BMI indicates body mass index; WH, waist-to-hip; SBP, systolic blood pressure; DBP, diastolic blood pressure; Total Chol, total cholesterol; HDL-C, high-density lipoprotein cholesterol; LDL-C, low-density lipoprotein cholesterol; TG, triglycerides; MetS metabolic syndrome; cIMT, carotid intima-media thickness;

**Supplementary Figure S1.** Percentage change from baseline of each item (Q) assessed in the MEDAS score for the entire cohort.

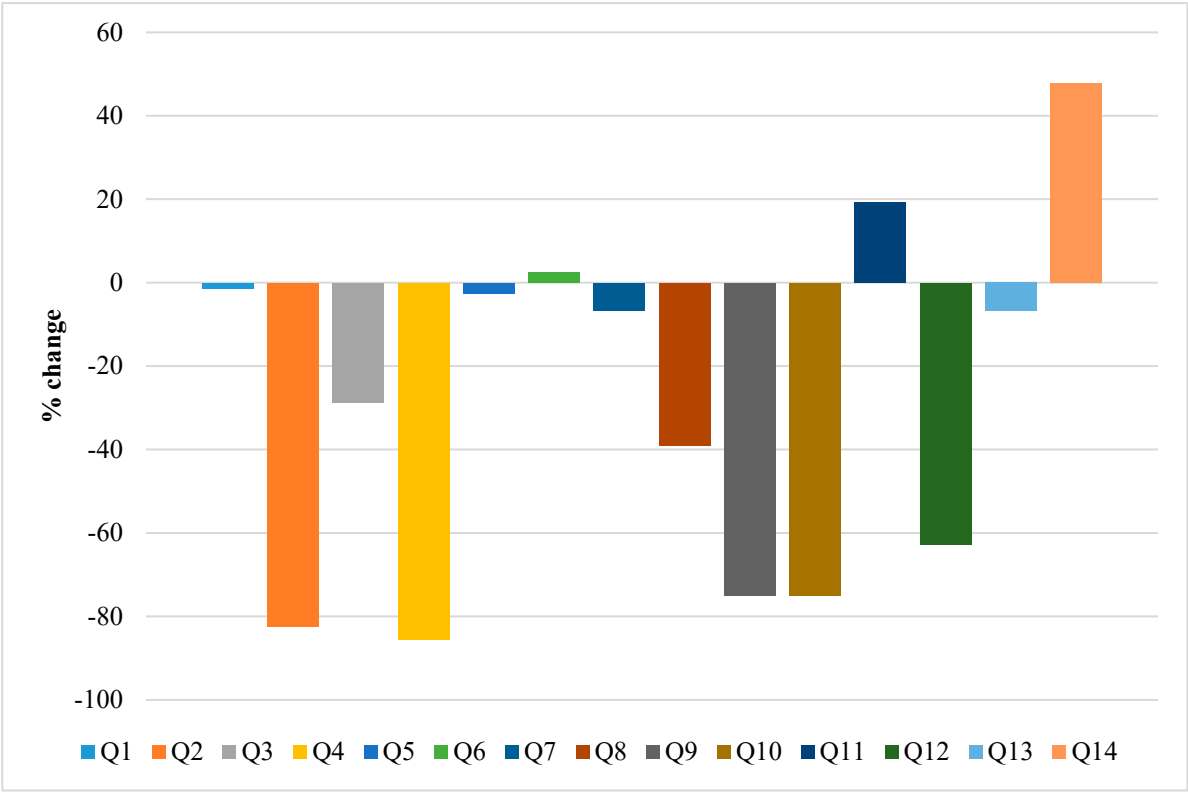

**Supplementary Figure S2.** Percentage change from baseline of each item (Q) assessed in the MEDAS score by sex.

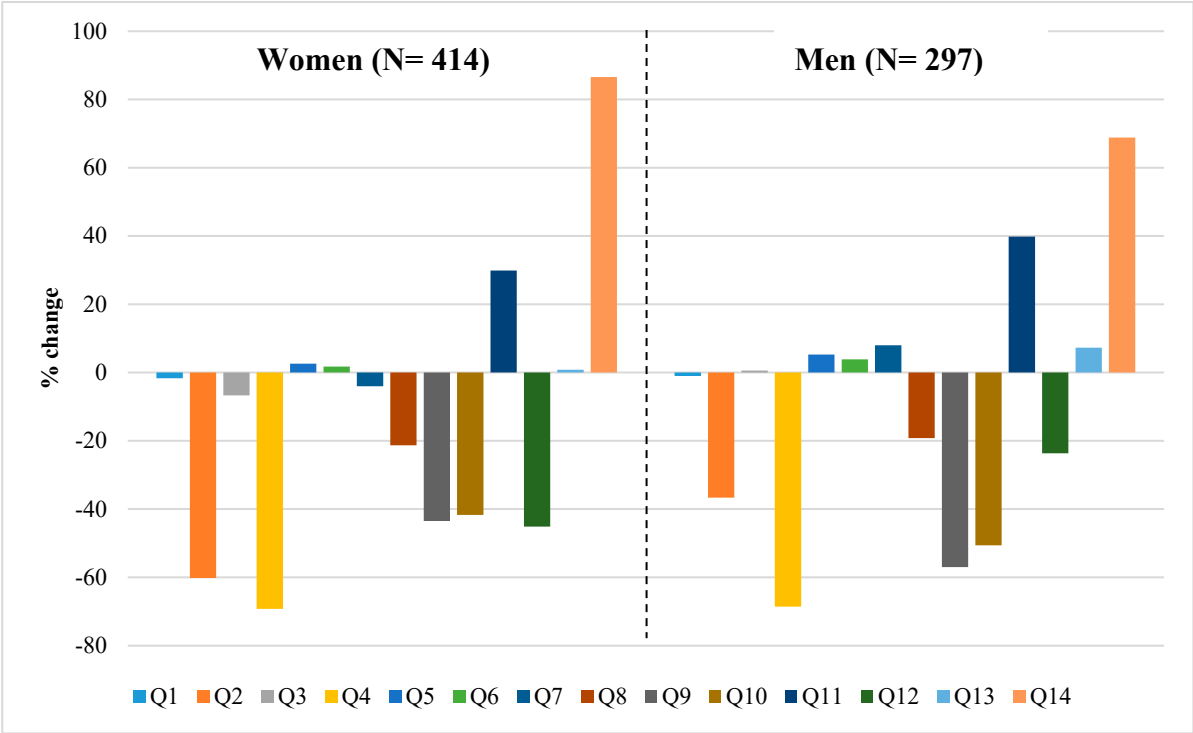

**Supplementary Figure S3.** Percentage change from baseline of each item (Q) assessed in the MEDAS score by age groups.

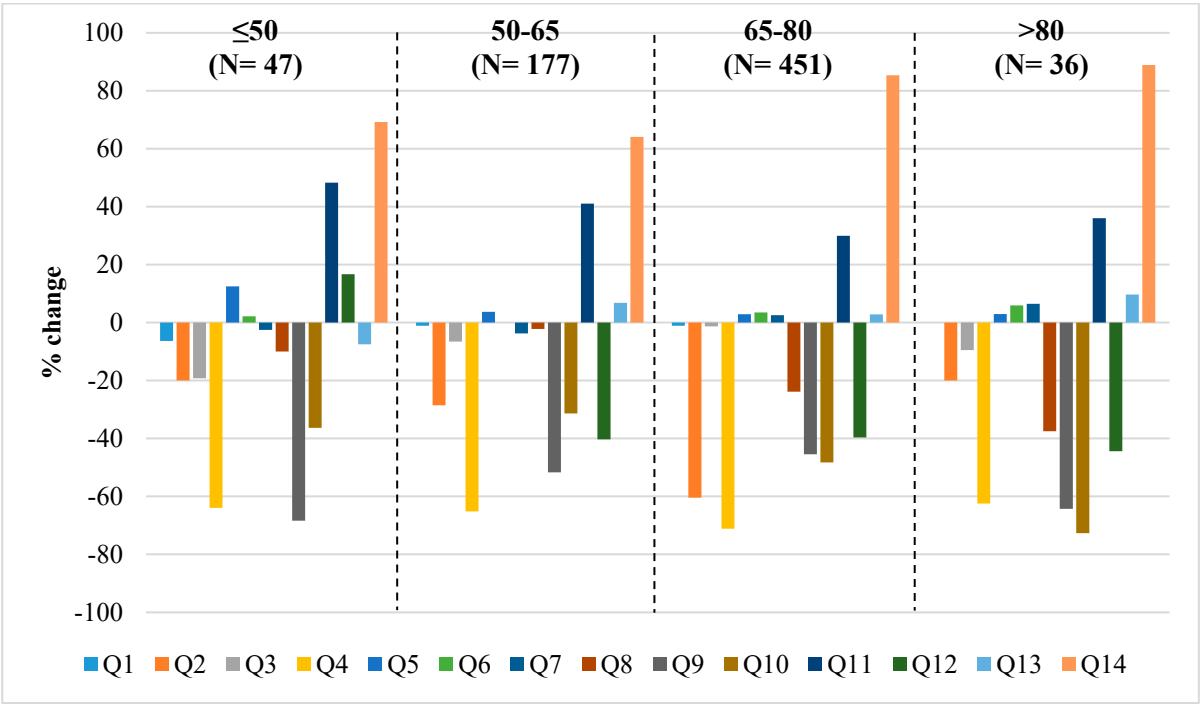

Supplement: s1 [file s1]
